# Supplementary material
Source: publisher figshare collection journal article supplement (https://tandf.figshare.com/ndownloader/files/22216872)
Supplement: Supplementary file 1 [file 22216872]

**Table S1.** Primers used in real-time qPCR assay in Figure 1.

| Gene locus | Sequence (5' -> 3') | |
| --- | --- | --- |
| FP | RP |
| At1G66950 | CTCGTAGTCGTTGGCAATGG | GAGGCCAAACTCACTCTCCC |
| At1G10550 | CGTTTGGGACGGTTCAGAGT | CAACGGAAACCACGAAAGGG |
| At3G59220 | GGCGATGAAGGTGTTTTCGG | AAGGGACCACACTGAACCAC |
| At1G59500 | GCCGGGATTAGACAAAGGCA | GACGTCCTGAAGTAGTCGCT |
| At1G15520 | TGACGCCTAACCACCACATC | TTCCCACCACACAGGCATAC |
| At3G59900 | TAGTTTTGCCGCCGTTACCT | GGCATGAAGGCAAGAACGAC |
| At1G17840 | AGTCCAAGTTTGTTGTTCATGC | GTGTGAACGTTGAACTGATAGAA |
| At4G29050 | GTCGAGCGTCATCCAGTTCT | ACGTCAATGTAGCCACCGAA |
| At5G61890 | GGTGGGTATGGGAGTGGTAC | AAGAAGAATCCCCAAAGCGC |
| At1G74930 | GAAGAGAAACACGGCGATG | AAATTGAGCGGCGTCGAAAG |
| At5G20820 | AACACGGAGGACATACCACG | GACAACTTCGCACGACACAG |
| At3G47790 | GTTCGACCGATGGCTCTGAT | ACCCATGTGAAGAAGAGCGG |
| At1G73220 | GCATCCTCGACAGCGTATGA | TCATTGCGCTTTCCCTTCCT |
| At5G51190 | AGCATGAGGACTTGGGAGAC | GTCCCAAAACCCCTTCCAAC |
| At3G45410 | ATTCCGAGTTCAACGGGAGG | AGCGGCTGTTGCAGATAAGT |
| At5G57560 | CACTGCTTCTTACCGTGGCT | CGAGCCAGTAGTAGTCCCCT |
| At2G46310 | GATGACGAACCTAAACCGGC | CGCGGCTCTATCGTAACCTA |
| At3G28580 | ATGGCGATGATGGGTCAGTT | GGGTAGAAGCGACCGAAGAG |
| At3G22910 | ACACACGTCTCGGGATCAAC | CAAACCCGAGAGAGAGCGTT |
| At1G29490 | ACTGCGGATCAAGTACGCTT | CGAATCGAATGGCAACGTGA |
